# Supplementary material for: Half of US population exposed to adverse lead levels in early childhood
Source: PubMed Central journal article supplement — Proc Natl Acad Sci U S A. 2022 Mar 7;119(11):e2118631119. doi: 10.1073/pnas.2118631119 (PMC8931364; doi:10.1073/pnas.2118631119), 2022-03-07
Supplement: pnas.2118631119.sapp.pdf [file pnas.2118631119.sapp.pdf]

Supplementary Information For

Half of US Population Exposed to Adverse Lead Levels in Early Childhood

Michael J. McFarland, Matt E. Hauer, Aaron Reuben

Corresponding author: Michael McFarland

Email: mmcfarland@fsu.edu

**This section includes:**

Supplementary text

Tables S1 to S3

Figures S1 and S2

## **Supplementary text**

The Dataset1 file is the result of our demographic analysis. It started with the proportion of young children with various blood lead levels from 1940-2015 and performed a demographic analysis to give estimates for the entire population from 2015-2100. It provides the estimated proportion of the population exposed to various blood-lead levels by cohort and year. This data can be used by other researchers as cohort specific estimates of lead exposure in early life. Dataset2 provides the R code used to create Dataset1 as well as Figure 2 in the manuscript.

**Table S1.** NHANES ample Sizes (1976-2016)

| NHANES YEARS | Sample Size (N = 11,616) |
|--------------|--------------------------|
| 1976         | 453                      |
| 1977         | 425                      |
| 1978         | 368                      |
| 1979         | 409                      |
| 1980         | 46                       |
| 1988-1991    | 1,794                    |
| 1992-1994    | 1,944                    |
| 1999-2000    | 604                      |
| 2001-2002    | 747                      |
| 2003-2004    | 749                      |
| 2005-2006    | 801                      |
| 2007-2008    | 675                      |
| 2009-2010    | 701                      |
| 2011-2012    | 586                      |
| 2013-2014    | 664                      |
| 2015-2016    | 650                      |

**Table S2.** Blood Lead Levels as a Function of Leaded-Gasoline Consumption

| Blood Lead Level Categories (µg/dL) | Equation                                                                                                                           | R <sup>2</sup> |
|-------------------------------------|------------------------------------------------------------------------------------------------------------------------------------|----------------|
| 0-4.9                               | $BLL_{year} = -7.94 \times 10^{-6}(lead_{year}) + 1.77 \times 10^{-11}(lead_{year})^2 + .87$                                       | 0.93           |
| 5-9.9                               | $BLL_{year} = 4.15 \times 10^{-6}(lead_{year}) + 1.46 \times 10^{-11}(lead_{year})^2 - 1.66 \times 10^{-16}(lead_{year})^3 + .13$  | 0.73           |
| 10-14.9                             | $BLL_{year} = -1.78 \times 10^{-6}(lead_{year}) + 4.46 \times 10^{-11}(lead_{year})^2 - 1.43 \times 10^{-16}(lead_{year})^3 + .07$ | 0.90           |
| 15-19.9                             | $BLL_{year} = 6.00 \times 10^{-6}(lead_{year}) - 5.13 \times 10^{-12}(lead_{year})^2 + 5.27 \times 10^{-17}(lead_{year})^3 + .02$  | 0.97           |
| 20-24.9                             | $BLL_{year} = 6.94 \times 10^{-7}(lead_{year}) - 1.08 \times 10^{-11}(lead_{year})^2 + 5.33 \times 10^{-17}(lead_{year})^3 + .00$  | 0.85           |
| 25-29.9                             | $BLL_{year} = -3.47 \times 10^{-9}(lead_{year}) + 1.43 \times 10^{-12}(lead_{year})^2 + 1.28 \times 10^{-17}(lead_{year})^3 + .00$ | 0.75           |
| 30+                                 | $BLL_{year} = 6.15 \times 10^{-8}(lead_{year}) - 1.99 \times 10^{-12}(lead_{year})^2 + 1.33 \times 10^{-17}(lead_{year})^3 + .00$  | 0.79           |

**Table S3.** Numbers used to Calculate IQ Loss From Gould <sup>1 a</sup>

| <b>BLL<br/>(<math>\mu\text{g/dL}</math>)</b> | <b>IQ point<br/>point loss per 1 <math>\mu\text{g/dL}</math></b> |
|----------------------------------------------|------------------------------------------------------------------|
| 2-10                                         | 0.513                                                            |
| 10-20                                        | 0.19                                                             |
| >20                                          | 0.11                                                             |

<sup>a</sup>Data from Lanphear et al.<sup>2</sup> assume uniform decreases within BLL groups.

For example, among those exposed to 10-15  $\mu\text{g/dL}$  of blood lead we calculated IQ lost as  $7.5 \times (.513) + 5 \times (.19) = 4.8$

**Figure S1. Blood Lead Levels in Early Life after Treating 1976-1980 as the same Time Period**

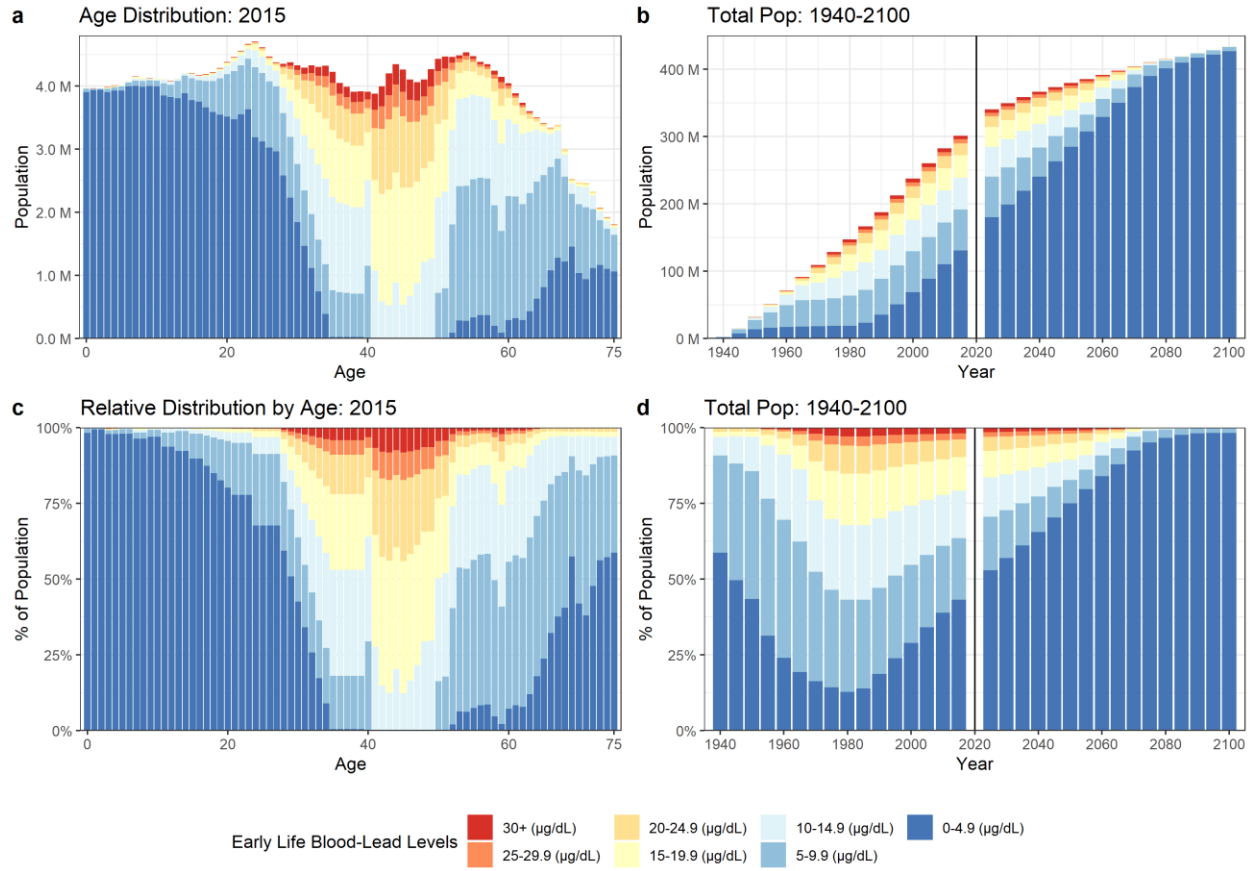

**Figure S2.** Blood Lead Levels at Ages 1-5 by Race and Age in 2015 for those Under 45 Years Old.

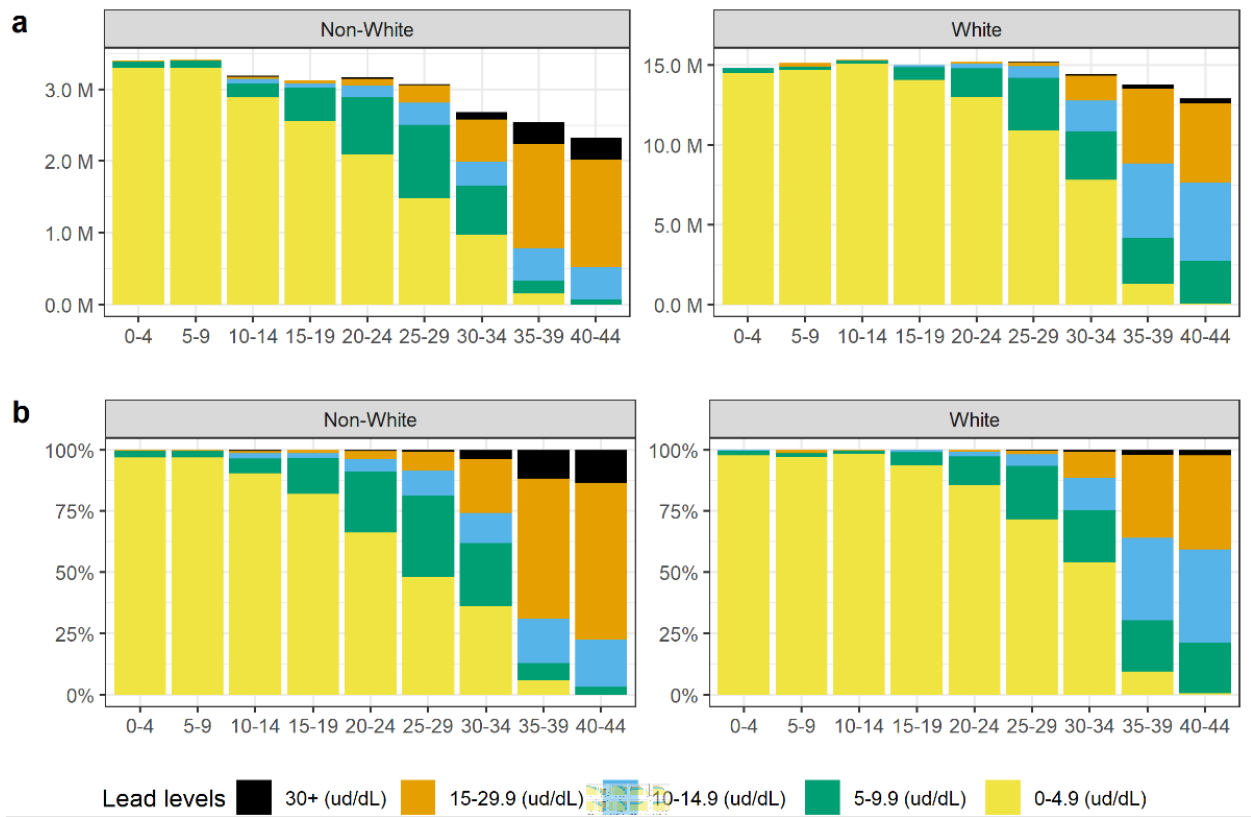

## REFERENCES

1. Gould E. Childhood lead poisoning: conservative estimates of the social and economic benefits of lead hazard control. *Environmental health perspectives* 2009; 117(7): 1162-1167. <https://doi.org/10.1289/ehp.0800408>
2. Lanphear BP, Hornung R, Khoury J, Yolton K, Baghurst P, Bellinge, DC, Roberts R. Low-level environmental lead exposure and children's intellectual function: an international pooled analysis. *Environmental health perspectives* 2005;113(7): 894-899. [doi.org/10.1289/ehp.7688](https://doi.org/10.1289/ehp.7688)
